# Supplementary material
Source: PubMed Central journal article supplement (PMC2077262)
Supplement: pnas_0703974104_1.pdf [file pnas_0703974104_1.pdf]

**Table 1. Parameters obtained from analyzing time-resolved fluorescence data of Cy3-labeled DNA with a double exponential decay model**

| <b>DNA</b> | <b>Relative fluorescence intensity</b> | <b><math>\tau_1</math>, ns</b> | <b><math>A_1</math>, %</b> | <b><math>\tau_2</math>, ns</b> | <b><math>A_2</math>, %</b> |
|------------|----------------------------------------|--------------------------------|----------------------------|--------------------------------|----------------------------|
| ss-DNA     | 1.0                                    | 0.6                            | 91                         | 2.7                            | 9                          |
| ds-DNA     | 1.8                                    | 0.8                            | 73                         | 2.6                            | 27                         |

$\tau$  and  $A$  denote the excited state lifetime and relative amplitude, respectively.
